# Supplementary material for: Anionic N-heterocyclic carbenes (NHCs): a versatile route to saturated NHCs bearing pendant weakly coordinating anions
Source: Royal Society of Chemistry journal article supplement (doi:10.1039/c4dt02662d), 2014-01-01
Supplement: c4dt02662d1.pdf [file c4dt02662d1.pdf]

# **Anionic *N*-Heterocyclic Carbenes (NHCs): A Versatile Route to Saturated NHCs Bearing Pendant Weakly Coordinating Anions**

Nicholas Phillips, Rémi Tirfoin and Simon Aldridge\*

Supplementary Information (7 pages total)

|                                                                |    |
|----------------------------------------------------------------|----|
| 1. General details of synthetic procedures and instrumentation | s2 |
| 2. Syntheses and characterizing data for new compounds         | s3 |
| 3. References for ESI                                          | s7 |

## 1. General details of synthetic procedures and instrumentation

All reactions involving air- or moisture-sensitive compounds were carried out under an inert atmosphere by using Schlenk-type glassware or in a glovebox. Solvents were dried using an MBraun SPS800 prior to use. NMR-solvents were dried over potassium or molecular sieves and degassed before use. NMR samples were prepared under argon in 5 mm Wilmad 507-PP tubes fitted with J. Young Teflon valves when necessary.  $^1\text{H}$  and  $^{13}\text{C}$  NMR spectra were measured on Bruker Ascend-400 or AVII-500 spectrometer and referenced internally to residual protio-solvent ( $^1\text{H}$ ) or solvent ( $^{13}\text{C}$ ) resonances and are reported relative to tetramethylsilane ( $\delta = 0$  ppm).  $^{11}\text{B}$  and  $^{19}\text{F}$  spectra are referenced with respect to  $\text{BF}_3\cdot\text{OEt}_2$  and  $\text{CFCl}_3$ , respectively. Chemical shifts are quoted in  $\delta$  (ppm) and coupling constants in Hz. Elemental analyses were carried out by London Metropolitan University. Unless otherwise noted, all starting materials were commercially available and used without further purification. The following compounds were prepared via literature methods: *N,N'*-diisopropylphenyl-*N*-allylformamidinium (**1a**),<sup>s1</sup>  $\text{B}(\text{C}_6\text{F}_5)_3$ ,<sup>s2</sup>  $[\text{Rh}(\text{COD})\text{Cl}]_2$ ,<sup>s3</sup> and  $(\text{THT})\text{AuCl}$ .<sup>s4</sup>

## 2. Syntheses and characterizing data for new compounds

***N,N'*-bis(diisopropylphenyl)-*N*-(1-butenyl)formamidine, **1b** and *N,N'*-bis(diisopropylphenyl)-*N*-(1-pentenyl)formamidine, **1c**:** A common method was used for the synthesis of these two precursors, exemplified here for **1b**. A mixture of *N,N'*-bis(2,6-diisopropylphenyl)formamidine (2.7 g, 7.4 mmol), 4-bromo-1-butene (1.0 g, 7.4 mmol) and K<sub>2</sub>CO<sub>3</sub> (0.5 g, 3.7 mmol) were suspended in acetonitrile (150 cm<sup>3</sup>). The reaction mixture was then refluxed in the dark for 4 d. After cooling, volatiles were removed under vacuum and the residue was dissolved in CH<sub>2</sub>Cl<sub>2</sub> (80 cm<sup>3</sup>). This solution was filtered through a pad of silica gel after which the solvent was removed. Recrystallisation of the crude product from hexane at -30 °C gave colourless crystals in 26% yield (0.80 g). The corresponding synthesis of **1c** from 5-bromo-1-pentene gave the product as colourless crystals in 68% yield (2.50 g).

**Spectroscopic data:** (for **1b**) <sup>1</sup>H NMR (CDCl<sub>3</sub>, 400 MHz, 298 K): δ<sub>H</sub> 7.39 – 7.02 (7H, m, CH Dipp and NCHN), 5.91 (1H, m, CH alkene), 5.12 (2H, m, CH<sub>2</sub> alkene), 3.86 (2H, m, NCH<sub>2</sub>), 3.29 (2H, overlapping m, CH <sup>i</sup>Pr), 3.28 (2H, overlapping m, CH <sup>i</sup>Pr), 2.58 (2H, m, NCH<sub>2</sub>CH<sub>2</sub>), 1.36 (6H, d, <sup>3</sup>J<sub>HH</sub> = 6.8 Hz, CH<sub>3</sub> <sup>i</sup>Pr), 1.25 (12H, d, <sup>3</sup>J<sub>HH</sub> = 6.8 Hz, CH<sub>3</sub> <sup>i</sup>Pr), 1.18 (6H, d, <sup>3</sup>J<sub>HH</sub> = 6.8 Hz, CH<sub>3</sub> <sup>i</sup>Pr). <sup>13</sup>C NMR (CDCl<sub>3</sub>, 100 MHz, 298 K): δ<sub>C</sub> 151.0 (NCHN), 148.0, 147.4 (NC Dipp), 139.8, 138.7 (*ortho*-C Dipp), 135.6 (CH alkene), 128.6 (*para*-CH Dipp), 124.3, 122.6 (*meta*-CH Dipp), 116.4 (CH<sub>2</sub> alkene), 49.5 (NCH<sub>2</sub>), 31.7 (NCH<sub>2</sub>CH<sub>2</sub>), 28.2, 27.8 (CH <sup>i</sup>Pr), 25.3, 24.1, 23.5 (CH<sub>3</sub> <sup>i</sup>Pr). MS (EI +ve): *m/z* 418.3 (M<sup>+</sup>). Accurate mass ([C<sub>29</sub>H<sub>42</sub>N<sub>2</sub>]<sup>+</sup>): 418.3341(meas.), 418.3348(calc.). (For **1c**) <sup>1</sup>H NMR (CDCl<sub>3</sub>, 400 MHz, 298 K): δ<sub>H</sub> 7.36 – 7.01 (7H, m, CH Dipp and NCHN), 5.84 (1H, m, CH alkene), 5.02 (2H, m, CH<sub>2</sub> alkene), 3.79 (2H, m, NCH<sub>2</sub>), 3.27 (4H, app sept, <sup>3</sup>J<sub>HH</sub> = 6.7 Hz, CH <sup>i</sup>Pr), 2.16 (2H, app qt, CH<sub>2</sub>CH=CH<sub>2</sub>), 1.87 (2H, m, NCH<sub>2</sub>CH<sub>2</sub>), 1.34 (6H, d, <sup>3</sup>J<sub>HH</sub> = 6.8 Hz, CH<sub>3</sub> <sup>i</sup>Pr), 1.23 (12H, d, <sup>3</sup>J<sub>HH</sub> = 7.2 Hz, CH<sub>3</sub> <sup>i</sup>Pr), 1.16 (6H, d, <sup>3</sup>J<sub>HH</sub> = 6.8 Hz, CH<sub>3</sub> <sup>i</sup>Pr). <sup>13</sup>C NMR (CDCl<sub>3</sub>, 100 MHz, 298 K): δ<sub>C</sub> 151.1 (NCHN), 148.0, 147.4 (NC Dipp), 139.9, 138.7 (*ortho*-C Dipp), 137.9 (CH alkene), 128.5 (*para*-CH Dipp), 124.3, 122.6 (*meta*-CH Dipp), 114.8 (CH<sub>2</sub> alkene), 49.6 (NCH<sub>2</sub>), 31.5 (CH<sub>2</sub>CH=CH<sub>2</sub>), 28.2, 27.8 (CH <sup>i</sup>Pr), 26.3 (NCH<sub>2</sub>CH<sub>2</sub>), 25.3, 24.1, 23.5 (CH<sub>3</sub> <sup>i</sup>Pr). MS (EI +ve): *m/z* 432.4 (M<sup>+</sup>). Accurate mass ([C<sub>30</sub>H<sub>44</sub>N<sub>2</sub>]<sup>+</sup>): 432.3515(meas.), 432.3505(calc.). Elemental analysis: calc. for C<sub>30</sub>H<sub>44</sub>N<sub>2</sub>: C 83.28, H 10.25, N 6.47, meas. C 82.76, H 10.54, N 6.68.

**H(5-Dipp<sup>BArF</sup>), **2a**:** Tris(pentafluorophenyl)borane (154 mg, 0.3 mmol) was added to a stirred solution of **1a** (121 mg, 0.3 mmol) in toluene (15 cm<sup>3</sup>). The reaction mixture was then allowed to stir for 1 h, after which volatiles were removed *in vacuo*. Washing with hexanes and drying *in vacuo* yielded the crude product as a white powder. X-ray quality crystals were obtained in 62% yield (0.17 g) from a concentrated solution of toluene stored at -30 °C.

**Spectroscopic data:** <sup>1</sup>H NMR (CDCl<sub>3</sub>, 300 MHz, 298 K): δ 7.32–7.04 (7H, m, CH Dipp and NCHN), 4.34 (1H, m, NCH), 3.80 (1H, apparent tr, <sup>2</sup>J<sub>HH</sub> = 10.8 Hz, NCH<sub>2</sub>), 3.61 (1H, apparent tr, <sup>2</sup>J<sub>HH</sub> = 10.8 Hz, NCH<sub>2</sub>), 3.15 (1H, sept, <sup>3</sup>J<sub>HH</sub> = 5.9 Hz, CH <sup>i</sup>Pr), 2.80 (1H, sept, <sup>3</sup>J<sub>HH</sub> = 5.9 Hz, CH <sup>i</sup>Pr), 2.62 (1H, sept, <sup>3</sup>J<sub>HH</sub> = 6.7 Hz, CH <sup>i</sup>Pr), 2.48 (1H, sept, <sup>3</sup>J<sub>HH</sub> = 5.3 Hz, CH <sup>i</sup>Pr), 2.16 (1H, apparent tr, <sup>2</sup>J<sub>HH</sub> = 14.7 Hz, CH<sub>2</sub>-B), 1.51 (1H, apparent d, <sup>2</sup>J<sub>HH</sub> = 12.3 Hz, CH<sub>2</sub>-B), 1.33 (3H, d, <sup>3</sup>J<sub>HH</sub> = 6.9 Hz, CH<sub>3</sub> <sup>i</sup>Pr), 1.20 (3H, d, <sup>3</sup>J<sub>HH</sub> = 6.9 Hz, CH<sub>3</sub> <sup>i</sup>Pr), 1.13 (3H, overlapping d, CH<sub>3</sub> <sup>i</sup>Pr), 1.11 (3H, overlapping d, CH<sub>3</sub> <sup>i</sup>Pr), 1.00 (12H, overlapping d, CH<sub>3</sub> <sup>i</sup>Pr). <sup>13</sup>C NMR (CDCl<sub>3</sub>, 100 MHz, 298 K): δ 155.6 (NCHN), 148.0 (dm, <sup>1</sup>J<sub>CF</sub> = 240.1 Hz, *ortho*-CF), 147.6, 146.4 (NC Dipp), 146.0, 146.0 (*ortho*-C Dipp), 138.2 (dm, <sup>1</sup>J<sub>CF</sub> = 243.0 Hz, *para*-CF), 136.6 (dm, <sup>1</sup>J<sub>CF</sub> = 245.0 Hz, *meta*-CF), 131.7, 131.6 (*para*-CH Dipp), 127.4, 125.1, 125.0, 124.8 (*meta*-CH Dipp), 71.0 (NCH), 58.8 (NCH<sub>2</sub>), 29.5, 29.4, 29.3, 29.0 (CH <sup>i</sup>Pr), 26.4, 25.2, 24.9, 24.8, 24.0, 23.6, 22.6 (CH<sub>3</sub> <sup>i</sup>Pr), (CH<sub>2</sub>B not observed). <sup>11</sup>B NMR (CDCl<sub>3</sub>, 128 MHz, 298 K): δ -14.65 (s). <sup>19</sup>F NMR (CDCl<sub>3</sub>, 282 MHz, 298 K): δ -131.44 (d, <sup>3</sup>J<sub>FF</sub> = 28.8 Hz, *ortho*-F), -161.64 (tr, <sup>3</sup>J<sub>FF</sub> = 21.3 Hz, *para*-F), -165.36 (m, *meta*-F). MS (EI +ve): *m/z* 403.3 ([M-BCF]<sup>+</sup>, 100%), 512.0 ([BCF]<sup>+</sup>, 30%). Elemental analysis: calcd. for C<sub>46</sub>H<sub>40</sub>BF<sub>15</sub>N<sub>2</sub>: C 60.28, H 4.40, N 3.06, meas. C 61.12, H 4.22, N 3.58.

**Crystallographic data:** **2a** C<sub>7</sub>H<sub>8</sub>, C<sub>53</sub>H<sub>48</sub>BF<sub>15</sub>N<sub>2</sub>, M<sub>r</sub> = 1008.76, monoclinic, *C* 2/*c*, *a* = 35.4499(3), *b* = 11.1438(1), *c* = 25.1650(2) Å, β = 104.2861(3)°, *V* = 9633.92(14) Å<sup>3</sup>, *Z* = 8, ρ<sub>c</sub> = 1.391 Mg m<sup>-3</sup>, *T* = 150 K, λ = 0.710730 Å, 21331 reflections collected, 10963 independent [*R*(int) = 0.027], which were used in calculations. *R*<sub>1</sub> = 0.0603, *wR*<sub>2</sub> = 0.1340 for observed unique reflections [*I* > 2σ(*I*)] and *R*<sub>1</sub> = 0.0875, *wR*<sub>2</sub> = 0.1603 for all unique reflections. Max. and min. residual electron densities 0.89 and -0.52 e Å<sup>-3</sup>. CCDC 1006573.

**H(6-Dipp<sup>BArF</sup>), **2b**:** A solution of B(C<sub>6</sub>F<sub>5</sub>)<sub>3</sub> (0.650 g, 1.3 mmol) in toluene (10 cm<sup>3</sup>) was added to a stirred solution of **1b** (0.542 g, 1.3 mmol) also in toluene (10 cm<sup>3</sup>). After stirring for 1 h under inert atmosphere conditions, the reaction mixture can be opened to the air and volatiles removed under vacuum. The white residue was washed with hexane (30 cm<sup>3</sup>) and dissolved in toluene (30 cm<sup>3</sup>). This solution was concentrated and stored at -30 °C to afford colourless crystals of the product in 66% yield (0.78 g). Crystals suitable for X-ray crystallography were obtained from layering a CH<sub>2</sub>Cl<sub>2</sub> solution with hexane and storage at 20 °C.

**Spectroscopic data:** <sup>1</sup>H NMR (CDCl<sub>3</sub>, 400 MHz, 298 K): δ<sub>H</sub> 7.35 (1H, tr, <sup>3</sup>J<sub>HH</sub> = 7.8 Hz, *para*-CH), 7.27 (1H, tr, <sup>3</sup>J<sub>HH</sub> = 7.8 Hz, *para*-CH), 7.20 – 7.02 (5H, m, *meta*-CH and NCHN), 4.07 (1H, m, NCH<sub>2</sub>), 3.37 (1H, d m, <sup>2</sup>J<sub>HH</sub> = 14.0 Hz, NCH<sub>2</sub>), 3.17 (1H, br m, NCH), 2.98 (2H, sept, <sup>3</sup>J<sub>HH</sub> = 6.5 Hz, CH <sup>i</sup>Pr), 2.65 (1H, sept, <sup>3</sup>J<sub>HH</sub> = 6.8 Hz, CH <sup>i</sup>Pr), 2.37 (1H, sept, <sup>3</sup>J<sub>HH</sub> = 6.6 Hz, CH <sup>i</sup>Pr), 2.35 (1H, m, BCH<sub>2</sub>), 2.23 (2H, m, NCH<sub>2</sub>CH<sub>2</sub>), 2.20 (1H, m, BCH<sub>2</sub>), 1.35 (3H, d, <sup>3</sup>J<sub>HH</sub> = 6.8 Hz, CH<sub>3</sub> <sup>i</sup>Pr), 1.24 (3H, d, <sup>3</sup>J<sub>HH</sub> = 6.8 Hz, CH<sub>3</sub> <sup>i</sup>Pr), 1.20 (3H, d, <sup>3</sup>J<sub>HH</sub> = 6.4 Hz, CH<sub>3</sub> <sup>i</sup>Pr), 1.19 (3H, d, <sup>3</sup>J<sub>HH</sub> = 6.4 Hz, CH<sub>3</sub> <sup>i</sup>Pr), 1.05 (3H, d, <sup>3</sup>J<sub>HH</sub>

= 6.8 Hz, CH<sub>3</sub> <sup>i</sup>Pr), 1.01 (3H, d, <sup>3</sup>J<sub>HH</sub> = 6.8 Hz, CH<sub>3</sub> <sup>i</sup>Pr), 0.98 (3H, d, <sup>3</sup>J<sub>HH</sub> = 6.8 Hz, CH<sub>3</sub> <sup>i</sup>Pr), 0.96 (3H, d, <sup>3</sup>J<sub>HH</sub> = 7.2 Hz, CH<sub>3</sub> <sup>i</sup>Pr). <sup>13</sup>C NMR (CDCl<sub>3</sub>, 100 MHz, 298 K): δ<sub>C</sub> 152.6 (NCHN), 148.0 (br d, <sup>1</sup>J<sub>CF</sub> = 240 Hz, *ortho*-CF), 146.3, 146.0 (NC Dipp), 145.0, 144.9 (*ortho*-C Dipp), 138.0 (br d, <sup>1</sup>J<sub>CF</sub> = 244 Hz, *para*-CF), 136.6 (br d, <sup>1</sup>J<sub>CF</sub> = 262 Hz, *meta*-CF), 135.5, 134.3, 131.4, 130.9 (*para*-CH Dipp), 128.2, 125.3, 125.1, 124.8 (*meta*-CH Dipp), 63.2 (NCH), 46.8 (NCH<sub>2</sub>), 29.2, 29.0, 28.9 (CH <sup>i</sup>Pr), 26.8, 25.6, 25.5, 24.7, 24.3, 24.2 (CH<sub>3</sub> <sup>i</sup>Pr), 23.9 (br, CH<sub>2</sub>B), 23.2, 22.2 (CH<sub>3</sub> <sup>i</sup>Pr), 21.4 (NCH<sub>2</sub>CH<sub>2</sub>). <sup>11</sup>B NMR (CDCl<sub>3</sub>, 128 MHz, 298 K): δ<sub>B</sub> -14.47 (s, CBAr<sup>F</sup><sub>3</sub>). <sup>19</sup>F NMR (CDCl<sub>3</sub>, 376 MHz, 298 K): δ<sub>F</sub> -131.19 (d, <sup>3</sup>J<sub>FF</sub> = 20.3 Hz, *ortho*-F), -162.1 (tr, <sup>3</sup>J<sub>FF</sub> = 20.5 Hz, *para*-F), -165.48 (m, *meta*-F). Elemental analysis: calc. for C<sub>47</sub>H<sub>42</sub>N<sub>2</sub>BF<sub>15</sub>: C 60.66, H 4.55, N 3.01, meas. C 60.63, H 4.64, N 3.34.

**Crystallographic data:** **2b**, C<sub>47</sub>H<sub>42</sub>N<sub>2</sub>BF<sub>15</sub>, M<sub>r</sub> = 930.64, monoclinic, *P*2<sub>1</sub>/*n*, a = 10.4429(1), b = 32.1025(5), c = 12.9291(2) Å, β = 100.0078(12)°, V = 4268.44(10) Å<sup>3</sup>, Z = 4, ρ<sub>c</sub> = 1.448 Mg m<sup>-3</sup>, T = 150 K, λ = 1.54180 Å, 25214 reflections collected, 8853 independent [R(int) = 0.049], which were used in calculations. R<sub>1</sub> = 0.0471, wR<sub>2</sub> = 0.1258 for observed unique reflections [I > 2σ(I)] and R<sub>1</sub> = 0.0492, wR<sub>2</sub> = 0.1281 for all unique reflections. Max. and min. residual electron densities 0.40 and -0.29 e Å<sup>-3</sup>. CCDC 1006574.

**H(7-Dipp<sup>BArF</sup>) 2c:** A solution of B(C<sub>6</sub>F<sub>5</sub>)<sub>3</sub> (0.400 g, 0.9 mmol) in toluene (20 cm<sup>3</sup>) was added to a stirred solution of **1c** (0.474 g, 0.9 mmol) also in toluene (10 cm<sup>3</sup>). After stirring for 2 h under inert atmosphere conditions, the reaction mixture can be opened to the air and the solvent was removed under vacuum. The white residue was washed with hexane (30 cm<sup>3</sup>) and dissolved in Et<sub>2</sub>O (20 cm<sup>3</sup>). This solution was concentrated and stored at -30 °C to afford colourless crystals of the product in 59% yield (0.51 g). Crystals suitable for X-ray crystallography were obtained from an Et<sub>2</sub>O solution at -30 °C.

**Spectroscopic data:** <sup>1</sup>H NMR (CDCl<sub>3</sub>, 400 MHz, 298 K): δ<sub>H</sub> 7.41 (2H, overlapping tr, <sup>3</sup>J<sub>HH</sub> = 7.8 Hz, *para*-CH), 7.25 (3H, m, *meta*-CH), 7.17 (1H, s, NCHN), 7.16 (1H, m, *meta*-CH), 4.18 (1H, br m, NCH), 4.05 (1H, m, NCH<sub>2</sub>), 3.70 (1H, m, NCH<sub>2</sub>), 3.19 (1H, sept, <sup>3</sup>J<sub>HH</sub> = 6.9 Hz, CH <sup>i</sup>Pr), 2.98 (1H, sept, <sup>3</sup>J<sub>HH</sub> = 6.7 Hz, CH <sup>i</sup>Pr), 2.92 (1H, sept, <sup>3</sup>J<sub>HH</sub> = 6.8 Hz, CH <sup>i</sup>Pr), 2.53 (1H, sept, <sup>3</sup>J<sub>HH</sub> = 6.8 Hz, CH <sup>i</sup>Pr), 2.47 (1H, m, NCH<sub>2</sub>CH<sub>2</sub>), 2.31 (1H, m, NCHCH<sub>2</sub>), 2.20 (1H, m, NCHCH<sub>2</sub>), 2.15 (1H, m, NCH<sub>2</sub>CH<sub>2</sub>), 1.48 (3H, d, <sup>3</sup>J<sub>HH</sub> = 6.4 Hz, CH<sub>3</sub> <sup>i</sup>Pr), 1.32 (3H, d, <sup>3</sup>J<sub>HH</sub> = 6.8 Hz, CH<sub>3</sub> <sup>i</sup>Pr), 1.31 (3H, d, <sup>3</sup>J<sub>HH</sub> = 6.8 Hz, CH<sub>3</sub> <sup>i</sup>Pr), 1.25 (3H, d, <sup>3</sup>J<sub>HH</sub> = 6.0 Hz, CH<sub>3</sub> <sup>i</sup>Pr), 1.23 (3H, d, <sup>3</sup>J<sub>HH</sub> = 6.0 Hz, CH<sub>3</sub> <sup>i</sup>Pr), 1.17 (3H, d, <sup>3</sup>J<sub>HH</sub> = 6.8 Hz, CH<sub>3</sub> <sup>i</sup>Pr), 1.13 (3H, d, <sup>3</sup>J<sub>HH</sub> = 7.2 Hz, CH<sub>3</sub> <sup>i</sup>Pr), 0.97 (3H, d, <sup>3</sup>J<sub>HH</sub> = 6.8 Hz, CH<sub>3</sub> <sup>i</sup>Pr). <sup>13</sup>C NMR (CDCl<sub>3</sub>, 100 MHz, 298 K): δ<sub>C</sub> 158.0 (NCHN), 148.0 (br d, <sup>1</sup>J<sub>CF</sub> = 236 Hz, *ortho*-CF), 145.7, 145.3 (NC Dipp), 144.8, 143.7, 138.9 (*ortho*-C Dipp), 138.0 (br d, <sup>1</sup>J<sub>CF</sub> = 235 Hz, *para*-CF), 136.5 (br d, <sup>1</sup>J<sub>CF</sub> = 253 Hz, *meta*-CF), 135.9 (*ortho*-C Dipp), 131.0, 130.7 (*para*-CH Dipp), 125.6, 125.2, 125.0, 124.8 (*meta*-CH Dipp), 69.7 (NCH), 56.0 (NCH<sub>2</sub>), 29.3, 29.3 (CH <sup>i</sup>Pr), 29.2 (NCHCH<sub>2</sub>), 28.9 (CH <sup>i</sup>Pr), 26.2, 25.8, 25.1, 25.1 (CH<sub>3</sub> <sup>i</sup>Pr), 24.1 (NCH<sub>2</sub>CH<sub>2</sub>), 24.0, 23.6, 22.8, 22.8 (CH<sub>3</sub> <sup>i</sup>Pr). <sup>11</sup>B NMR (CDCl<sub>3</sub>, 128 MHz, 298 K): δ<sub>B</sub> -14.28 (s, CBAr<sup>F</sup><sub>3</sub>). <sup>19</sup>F NMR (CDCl<sub>3</sub>, 376 MHz, 298 K): δ<sub>F</sub> -130.80 (d, <sup>3</sup>J<sub>FF</sub> = 21.8 Hz, *ortho*-F), -162.1 (tr, <sup>3</sup>J<sub>FF</sub> = 20.5 Hz, *para*-F), -165.55 (m, *meta*-F). Elemental analysis: calc. for C<sub>48</sub>H<sub>44</sub>N<sub>2</sub>BF<sub>15</sub>: C 61.02, H 4.69, N 2.96, meas. C 60.51, H 4.59, N 2.99.

**Crystallographic data:** **2c**·2(Et<sub>2</sub>O), C<sub>56</sub>H<sub>64</sub>N<sub>2</sub>BF<sub>15</sub>O<sub>2</sub>, M<sub>r</sub> = 1092.92, triclinic, *P*-1, a = 12.3124(4), b = 15.5237(5), c = 15.6860(4) Å, α = 66.407(3), β = 100.0078(12), γ = 89.507(3)°, V = 2704.24 (16) Å<sup>3</sup>, Z = 2, ρ<sub>c</sub> = 1.342 Mg m<sup>-3</sup>, T = 150 K, λ = 1.54180 Å, 28501 reflections collected, 11217 independent [R(int) = 0.019], which were used in calculations. R<sub>1</sub> = 0.0347, wR<sub>2</sub> = 0.0873 for observed unique reflections [I > 2σ(I)] and R<sub>1</sub> = 0.0372, wR<sub>2</sub> = 0.0893 for all unique reflections. Max. and min. residual electron densities 0.31 and -0.26 e Å<sup>-3</sup>. CCDC 1006575.

**[K(18-crown-6)][(5-Dipp<sup>BArF</sup>)], 3:** K[N(SiMe<sub>3</sub>)<sub>2</sub>] (0.024 g, 0.12 mmol) in THF (10 cm<sup>3</sup>) was added to a stirred solution of **2a** (0.100 g, 0.11 mmol) also in THF (15 cm<sup>3</sup>). The mixture was allowed to stir for 30 min, then the mixture transferred onto 18-crown-6 (0.029 g, 0.11 mmol) and stirred for a further 10 min. Removal of the volatiles under vacuum and washing with hexanes yielded product as a white powder. Green oil can form on the surface of the product, which can be washed away using diethyl ether. X-ray quality crystals were obtained in 54% yield (0.07 g) from a concentrated solution in THF layered with pentane and stored at 20 °C.

**Spectroscopic data:** <sup>1</sup>H NMR (C<sub>6</sub>D<sub>5</sub>CD<sub>3</sub>, 400 MHz, 298 K): δ<sub>H</sub> 7.11-6.76 (6H, m, CH Dipp), 4.45 (1H, m, NCH), 4.19 (1H, tr, <sup>2</sup>J<sub>HH</sub> = 12.6 Hz, NCH<sub>2</sub>), 3.61 (1H, tr, <sup>2</sup>J<sub>HH</sub> = 11.4 Hz, NCH<sub>2</sub>), 3.26 (1H, sept, <sup>3</sup>J<sub>HH</sub> = 7.0 Hz, CH <sup>i</sup>Pr), 2.75 (1H, sept, <sup>3</sup>J<sub>HH</sub> = 6.8 Hz, CH <sup>i</sup>Pr), 2.68 (1H, overlapping tr, <sup>2</sup>J<sub>HH</sub> = 13.2 Hz, CH<sub>2</sub>-B), 2.56 (1H, sept, <sup>3</sup>J<sub>HH</sub> = 6.6 Hz, CH <sup>i</sup>Pr), 2.43 (1H, sept, <sup>3</sup>J<sub>HH</sub> = 6.8 Hz, CH <sup>i</sup>Pr), 1.72 (1H, br d, <sup>2</sup>J<sub>HH</sub> = 13.6 Hz, CH<sub>2</sub>-B), 1.44 (3H, d, <sup>3</sup>J<sub>HH</sub> = 6.9 Hz, CH<sub>3</sub> <sup>i</sup>Pr), 1.18 (3H, d, <sup>3</sup>J<sub>HH</sub> = 6.8 Hz, CH<sub>3</sub> <sup>i</sup>Pr), 1.08 (3H, d, <sup>3</sup>J<sub>HH</sub> = 6.8 Hz, CH<sub>3</sub> <sup>i</sup>Pr), 1.01, 0.99 (3H, overlapping d, CH<sub>3</sub> <sup>i</sup>Pr), 0.91 (6H, overlapping d, CH<sub>3</sub> <sup>i</sup>Pr), 0.89 (3H, overlapping d, CH<sub>3</sub> <sup>i</sup>Pr). <sup>13</sup>C NMR (C<sub>6</sub>D<sub>5</sub>CD<sub>3</sub>, 125 MHz, 298 K): δ<sub>C</sub> 165.5 (NCN), 148.8 (dm, <sup>1</sup>J<sub>CF</sub> = 236.9 Hz, *ortho*-CF), 147.8, 146.3 (NC Dipp), 146.1, 146.0, 143.7, 141.5 (*ortho*-C Dipp), 138.6 (dm, <sup>1</sup>J<sub>CF</sub> = 240.6 Hz, *para*-CF), 137.3 (dm, <sup>1</sup>J<sub>CF</sub> = 194.1 Hz, *meta*-CF), 131.7, 129.6 (*para*-CH Dipp), 125.6, 124.8, 123.8 (*meta*-CH Dipp), 71.5 (NCH), 58.8 (NCH<sub>2</sub>), 30.4, 29.7, 29.5, 29.1 (CH <sup>i</sup>Pr), 27.8 (CH<sub>2</sub>B), 26.2, 25.9, 24.4, 23.8, 23.5, 23.1, 22.8 (CH<sub>3</sub> <sup>i</sup>Pr). <sup>11</sup>B NMR (C<sub>6</sub>D<sub>5</sub>CD<sub>3</sub>, 128 MHz, 298 K): δ -14.4 (s). <sup>19</sup>F NMR (C<sub>6</sub>D<sub>5</sub>CD<sub>3</sub>, 376 MHz, 298 K): δ -130.89 (d, <sup>3</sup>J<sub>FF</sub> = 21.8 Hz, *ortho*-F), -161.24 (tr, <sup>3</sup>J<sub>FF</sub> = 20.3 Hz, *para*-F), -165.09 (m, *meta*-F). MS (ESI -ve): *m/z* 933.3 ([M+H<sub>2</sub>O]<sup>-</sup>, 100%). The extremely air-sensitive nature of **3** prevented reproducible elemental microanalysis.

**Crystallographic data:** **3**, C<sub>58</sub>H<sub>63</sub>BF<sub>15</sub>N<sub>2</sub>KO<sub>6</sub>, M<sub>r</sub> = 1219.03, monoclinic, *P* 2<sub>1</sub>/*n*, *a* = 10.5956(2), *b* = 22.6260(3), *c* = 24.4132(4) Å, β = 98.9391(6)°, *V* = 5781.64(16) Å<sup>3</sup>, *Z* = 4, ρ<sub>c</sub> = 1.400 Mg m<sup>-3</sup>, *T* = 150 K, λ = 0.710730 Å, 70863 reflections collected, 13012 independent [*R*(int) = 0.037], which were used in calculations. *R*<sub>1</sub> = 0.0689, *wR*<sub>2</sub> = 0.1251 for observed unique reflections [*I* > 2σ(*I*)] and *R*<sub>1</sub> = 0.1062, *wR*<sub>2</sub> = 0.1453 for all unique reflections. Max. and min. residual electron densities 1.01 and -0.69 e Å<sup>-3</sup>. CCDC 1006576.

**Generation and *in situ* characterization of [Li(thf)<sub>n</sub>][(6-Dipp)<sup>BARF</sup>]:** **2b** (0.040 g, 0.04 mmol) contained within a J. Young's NMR tube was dissolved in THF-d<sub>8</sub> (1 cm<sup>3</sup>) and the solution cooled to -78 °C. A solution of <sup>n</sup>BuLi in hexane (0.03 cm<sup>3</sup>, 1.6 M, 0.04 mmol) was then added and the mixture allowed to warm to room temperature. After sonication for 30 min to ensure that the reaction had gone to completion, <sup>1</sup>H, <sup>13</sup>C, <sup>11</sup>B and <sup>19</sup>F NMR spectra were measured. Conversion appeared to be quantitative by <sup>1</sup>H NMR.

**Spectroscopic data:** <sup>1</sup>H NMR (C<sub>4</sub>D<sub>8</sub>O, 400 MHz, 298 K): δ<sub>H</sub> 7.20 – 6.89 (6H, m, CH Dipp), 3.65 (1H, m, NCH<sub>2</sub>), 3.63 (2H, m, CH <sup>i</sup>Pr), 3.29 (1H, sept, <sup>3</sup>*J*<sub>HH</sub> = 6.9 Hz, CH <sup>i</sup>Pr), 2.86 (1H, m, CH <sup>i</sup>Pr), 2.83 (1H, m, NCH<sub>2</sub>), 2.57 (1H, m, BCH<sub>2</sub>), 2.55 (1H, m, NCH), 2.44 (1H, br m, BCH<sub>2</sub>), 2.10 (1H, m, NCH<sub>2</sub>CH<sub>2</sub>), 1.99 (1H, m, NCH<sub>2</sub>CH<sub>2</sub>), 1.37 (3H, d, <sup>3</sup>*J*<sub>HH</sub> = 7.2 Hz, CH<sub>3</sub> <sup>i</sup>Pr), 1.23 (3H, d, <sup>3</sup>*J*<sub>HH</sub> = 7.2 Hz, CH<sub>3</sub> <sup>i</sup>Pr), 1.22 (3H, d, <sup>3</sup>*J*<sub>HH</sub> = 6.4 Hz, CH<sub>3</sub> <sup>i</sup>Pr), 1.20 (3H, d, <sup>3</sup>*J*<sub>HH</sub> = 6.4 Hz, CH<sub>3</sub> <sup>i</sup>Pr), 1.09 (3H, d, <sup>3</sup>*J*<sub>HH</sub> = 6.8 Hz, CH<sub>3</sub> <sup>i</sup>Pr), 1.05 (3H, d, <sup>3</sup>*J*<sub>HH</sub> = 6.4 Hz, CH<sub>3</sub> <sup>i</sup>Pr), 1.05 (3H, d, <sup>3</sup>*J*<sub>HH</sub> = 6.4 Hz, CH<sub>3</sub> <sup>i</sup>Pr), 1.01 (3H, d, <sup>3</sup>*J*<sub>HH</sub> = 6.8 Hz, CH<sub>3</sub> <sup>i</sup>Pr). <sup>13</sup>C NMR (C<sub>4</sub>D<sub>8</sub>O, 100 MHz, 298 K): δ<sub>C</sub> 243.1 (NCN), 149.2 (br d, <sup>1</sup>*J*<sub>CF</sub> = 238 Hz, *ortho*-CF), 148.1, 147.9 (NC Dipp), 146.9, 146.5, 146.4, 145.5 (*ortho*-C Dipp), 138.5 (br d, <sup>1</sup>*J*<sub>CF</sub> = 255 Hz, *para*-CF), 137.3 (br d, <sup>1</sup>*J*<sub>CF</sub> = 242 Hz, *meta*-CF), 127.2, 126.6 (*para*-CH Dipp), 126.2, 124.1, 124.0, 123.1 (*meta*-CH Dipp), 56.3 (NCH), 43.3 (NCH<sub>2</sub>), 29.4, 29.3, 28.9, 28.7 (CH <sup>i</sup>Pr), 27.4 (NCH<sub>2</sub>CH<sub>2</sub>), 27.2, 26.4, 25.1 (CH<sub>3</sub> <sup>i</sup>Pr), 24.7 (br, CH<sub>2</sub>B), 24.4, 23.5, 22.4 (CH<sub>3</sub> <sup>i</sup>Pr). <sup>11</sup>B NMR (C<sub>4</sub>D<sub>8</sub>O, 128 MHz, 298 K): δ<sub>B</sub> -13.86 (s, C<sup>BARF</sup><sub>3</sub>). <sup>19</sup>F NMR (C<sub>4</sub>D<sub>8</sub>O, 376 MHz, 298 K): δ<sub>F</sub> -130.42 (d, <sup>3</sup>*J*<sub>FF</sub> = 19.2 Hz, *ortho*-F), -166.25 (tr, <sup>3</sup>*J*<sub>FF</sub> = 20.3 Hz, *para*-F), -168.28 (m, *meta*-F).

**(5-Dipp)<sup>BARF</sup>Rh(COD), 4: 2a** (0.222 g, 0.24 mmol) was dissolved in THF (15 cm<sup>3</sup>) and cooled to -78 °C. A 1.6M solution of <sup>n</sup>BuLi in hexane (0.15 cm<sup>3</sup>, 0.24 mmol) was added and the reaction mixture allowed to warm to room temperature and stirred for 30 min. The mixture was then transferred onto a stirred solution of [Rh(COD)Cl]<sub>2</sub> (0.060 mg, 0.12 mmol) also in THF (10 cm<sup>3</sup>). The reaction mixture was stirred for 2 h before volatiles were removed under vacuum. Washing the yellow residue with hexane (2 x 15 cm<sup>3</sup>) yielded the product in 51% yield (0.14 g). Crystals suitable for X-ray crystallography were obtained from a layering of a CH<sub>2</sub>Cl<sub>2</sub> solution with hexane and storage at 20 °C.

**Spectroscopic data:** <sup>1</sup>H NMR (CD<sub>2</sub>Cl<sub>2</sub>, 400 MHz, 298 K): δ<sub>H</sub> 7.55 – 7.27 (4H, m, CH-Dipp), 7.17 (2H, app tr, <sup>3</sup>*J*<sub>HH</sub> = 8.0 Hz, *meta*-CH Dipp), 4.13 (1H, br q, <sup>3</sup>*J*<sub>HH</sub> = 11.9 Hz, NCH), 3.71 (1H, sept, <sup>3</sup>*J*<sub>HH</sub> = 6.9 Hz, CH <sup>i</sup>Pr), 3.57 (3H, br m, 1H NCH<sub>2</sub> and 2H CH=CH), 3.39 (1H, br, CH=CH), 3.28 (1H, tr, <sup>3</sup>*J*<sub>HH</sub> = 10.4 Hz, NCH<sub>2</sub>), 3.07 (1H, br, CH=CH), 2.97 (3H, m, CH <sup>i</sup>Pr), 2.06 (1H, br, CH<sub>2</sub>B), 2.05 (3H, <sup>3</sup>*J*<sub>HH</sub> = 6.8 Hz, CH<sub>3</sub> <sup>i</sup>Pr), 2.00 (3H, m, CH<sub>2</sub> COD), 1.95 (1H, m, CH<sub>2</sub> COD), 1.84 (3H, <sup>3</sup>*J*<sub>HH</sub> = 6.8 Hz, CH<sub>3</sub> <sup>i</sup>Pr), 1.63 (1H, br d, <sup>3</sup>*J*<sub>HH</sub> = 12.4 Hz, CH<sub>2</sub>B), 1.52 (4H, m, CH<sub>2</sub> COD), 1.47 (3H, <sup>3</sup>*J*<sub>HH</sub> = 6.8 Hz, CH<sub>3</sub> <sup>i</sup>Pr), 1.45 (3H, <sup>3</sup>*J*<sub>HH</sub> = 6.8 Hz, CH<sub>3</sub> <sup>i</sup>Pr), 1.35 (3H, <sup>3</sup>*J*<sub>HH</sub> = 6.8 Hz, CH<sub>3</sub> <sup>i</sup>Pr), 1.23 (3H, <sup>3</sup>*J*<sub>HH</sub> = 6.8 Hz, CH<sub>3</sub> <sup>i</sup>Pr), 1.14 (3H, <sup>3</sup>*J*<sub>HH</sub> = 6.8 Hz, CH<sub>3</sub> <sup>i</sup>Pr), 1.13 (3H, <sup>3</sup>*J*<sub>HH</sub> = 7.2 Hz, CH<sub>3</sub> <sup>i</sup>Pr). <sup>13</sup>C NMR (CD<sub>2</sub>Cl<sub>2</sub>, 100 MHz, 298 K): δ<sub>C</sub> 176.9 (d, <sup>1</sup>*J*<sub>CRh</sub> = 40.9 Hz, NCN), 150.8, 150.1 (NC Dipp), 148.7 (br d, <sup>1</sup>*J*<sub>CF</sub> = 231 Hz, *ortho*-CF), 147.0 (*ortho*-C Dipp), 138.6 (br d, <sup>1</sup>*J*<sub>CF</sub> = 248 Hz, *para*-CF), 137.1 (br d, <sup>1</sup>*J*<sub>CF</sub> = 239 Hz, *ortho*-CF), 131.9, 130.7 (*para*-CH Dipp), 127.7, 127.1, 125.2, 124.9 (*meta*-CH Dipp), 105.5 (d, <sup>1</sup>*J*<sub>CRh</sub> = 6.8 Hz, CH=CH), 140.5 (d, <sup>1</sup>*J*<sub>CRh</sub> = 5.9 Hz, CH=CH), 69.7 (d, <sup>1</sup>*J*<sub>CRh</sub> = 16.6 Hz, CH=CH), 69.5 (d, <sup>1</sup>*J*<sub>CRh</sub> = 17.4 Hz, CH=CH), 69.3 (NCH), 61.6 (NCH<sub>2</sub>), 33.2, 33.1 (CH<sub>2</sub> COD), 30.7, 29.3 (CH <sup>i</sup>Pr), 28.3, 26.6, 26.6 (CH<sub>3</sub> <sup>i</sup>Pr), 26.4 (CH<sub>2</sub> COD), 25.8, 24.5, 24.0, 23.5, 23.2 (CH<sub>3</sub> <sup>i</sup>Pr). <sup>11</sup>B NMR (CD<sub>2</sub>Cl<sub>2</sub>, 128 MHz, 298 K): δ<sub>B</sub> -14.53 (C<sup>BARF</sup><sub>3</sub>). <sup>19</sup>F NMR (CD<sub>2</sub>Cl<sub>2</sub>, 376 MHz, 298 K): δ<sub>F</sub> -131.39 (d, <sup>3</sup>*J*<sub>FF</sub> = 22.9 Hz, *ortho*-F), -163.1 (tr, <sup>3</sup>*J*<sub>FF</sub> = 20.5 Hz, *para*-F), -166.46 (m, *meta*-F). Elemental analysis: calc. for C<sub>54</sub>H<sub>51</sub>BF<sub>15</sub>RhN<sub>2</sub>: C 57.56, H 4.56, N 2.49, meas. C 57.60, H 4.80, N 2.19.

**Crystallographic data:** **4-C<sub>6</sub>H<sub>14</sub>, C<sub>60</sub>H<sub>65</sub>N<sub>2</sub>RhBF<sub>15</sub>**, M<sub>r</sub> = 1212.87, monoclinic, *P*2<sub>1</sub>/*n*, *a* = 10.3204(1), *b* = 23.3192(2), *c* = 23.4928(2) Å, β = 98.6503(8)°, *V* = 5589.54(9) Å<sup>3</sup>, *Z* = 4, ρ<sub>c</sub> = 1.441 Mg m<sup>-3</sup>, *T* = 150 K, λ = 1.54180 Å, 57957 reflections collected, 11714 independent [*R*(int) = 0.031], which were used in calculations. *R*<sub>1</sub> = 0.0297, *wR*<sub>2</sub> = 0.0773 for observed unique reflections [*I* > 2σ(*I*)] and *R*<sub>1</sub> = 0.0312, *wR*<sub>2</sub> = 0.0784 for all unique reflections. Max. and min. residual electron densities 0.74 and -0.62 e Å<sup>-3</sup>. CCDC 1006577.

**[Li(THF)<sub>4</sub>][(6-Dipp)<sup>BARF</sup>AuCl], 5: 2b** (0.058 g, 0.06 mmol) was dissolved in THF (15 cm<sup>3</sup>) and cooled to -78 °C. A 1.6M solution of <sup>n</sup>BuLi in hexane (0.04 cm<sup>3</sup>, 0.06 mmol) was added and the reaction mixture allowed to warm to room temperature and stirred for 30 min. The mixture was then transferred onto a solution of (THT)AuCl (20 mg, 0.06 mmol) also in THF (10 cm<sup>3</sup>) in the dark at 0 °C. Stirring in the dark was continued for 2 h resulting in a dark blue solution. Filtration through Celite and removal of volatiles under vacuum yielded the crude white product which was washed with hexane (2 x 15 cm<sup>3</sup>). Crystals suitable for X-ray crystallography were obtained from layering a concentrated THF solution with hexane and storage at 20 °C.

**Spectroscopic data:** <sup>1</sup>H NMR (CD<sub>2</sub>Cl<sub>2</sub>, 400 MHz, 298 K): δ<sub>H</sub> 7.38 – 6.97 (6H, m, CH Dipp), 3.87 (1H, m, NCH<sub>2</sub>), 3.57 (8H, m, OCH<sub>2</sub> THF), 3.29 (1H, m, NCH<sub>2</sub>), 3.27 (1H, m, CH <sup>i</sup>Pr), 3.19 (1H, sept, <sup>3</sup>*J*<sub>HH</sub> = 6.8 Hz, CH <sup>i</sup>Pr), 2.93 (1H, br d, <sup>3</sup>*J*<sub>HH</sub> =

14.8 Hz, NCH), 2.65 (1H, sept,  $^3J_{\text{HH}} = 6.9$  Hz, CH  $^i\text{Pr}$ ), 2.39 (1H, m, BCH<sub>2</sub>), 2.14 (2H, br, NCH<sub>2</sub>CH<sub>2</sub>), 1.82 (8H, m, CH<sub>2</sub> THF), 1.41 (3H, d,  $^3J_{\text{HH}} = 6.4$  Hz, CH<sub>3</sub>  $^i\text{Pr}$ ), 1.38 (3H, d,  $^3J_{\text{HH}} = 6.4$  Hz, CH<sub>3</sub>  $^i\text{Pr}$ ), 1.37 (3H, d,  $^3J_{\text{HH}} = 6.4$  Hz, CH<sub>3</sub>  $^i\text{Pr}$ ), 1.26 (6H, app tr,  $^3J_{\text{HH}} = 6.8$  Hz, CH<sub>3</sub>  $^i\text{Pr}$ ), 1.22 (1H, m, BCH<sub>2</sub>), 1.18 (6H, app tr,  $^3J_{\text{HH}} = 6.6$  Hz, CH<sub>3</sub>  $^i\text{Pr}$ ), 0.98 (3H, d,  $^3J_{\text{HH}} = 6.8$  Hz, CH<sub>3</sub>  $^i\text{Pr}$ ). <sup>13</sup>C NMR (CD<sub>2</sub>Cl<sub>2</sub>, 125 MHz, 298 K):  $\delta_{\text{C}}$  188.5 (NCN), 148.5 (br d,  $^1J_{\text{CF}} = 238$  Hz, *ortho*-CF), 147.8, 147.5 (NC Dipp), 146.4, 146.2, 142.7, 141.7 (*ortho*-C Dipp), 138.4 (br d,  $^1J_{\text{CF}} = 241$  Hz, *para*-CF), 137.0 (br d,  $^1J_{\text{CF}} = 234$  Hz, *meta*-CF), 129.4, 128.9 (*para*-CH Dipp), 124.9, 124.9, 124.6, 124.5 (*meta*-CH Dipp), 68.9 (CH<sub>2</sub>O THF), 62.2 (NCH), 46.5 (NCH<sub>2</sub>), 32.2 (CH<sub>2</sub>B), 29.3, 29.1, 29.0, 28.9 (CH  $^i\text{Pr}$ ), 25.9 (CH<sub>2</sub> THF), 25.9, 25.2, 25.1, 24.8, 24.7, 24.5, 23.9 (CH<sub>3</sub>  $^i\text{Pr}$ ), 23.2, (NCH<sub>2</sub>CH<sub>2</sub>), 22.8 (CH<sub>3</sub>  $^i\text{Pr}$ ). <sup>11</sup>B NMR (CD<sub>2</sub>Cl<sub>2</sub>, 128 MHz, 298 K):  $\delta_{\text{B}}$  -14.35 (CBAr<sup>F</sup><sub>3</sub>). <sup>19</sup>F NMR (CD<sub>2</sub>Cl<sub>2</sub>, 376 MHz, 298 K):  $\delta_{\text{F}}$  -131.20 (d,  $^3J_{\text{FF}} = 20.3$  Hz, *ortho*-F), -164.03 (tr,  $^3J_{\text{FF}} = 20.3$  Hz, *para*-F), -166.96 (m, *meta*-F). MS (ESI -ve):  $m/z$  1161.25. Accurate mass ([C<sub>47</sub>H<sub>41</sub>N<sub>2</sub>AuBClF<sub>15</sub>]<sup>-</sup>): 1161.2501 (meas.), 1161.2480 (calc.). While reproducible elemental microanalysis for **5** proved impossible to obtain, the corresponding [Ph<sub>3</sub>PNPPh<sub>3</sub>]<sup>+</sup> (PPN) salt can be obtained by simple metathesis with PPNCl and obtained as an analytically pure material. Elemental analysis: calc. for [Ph<sub>3</sub>PNPPh<sub>3</sub>][(6-Dipp<sup>BAr<sup>F</sup></sup>)AuCl]·2CH<sub>2</sub>Cl<sub>2</sub>, C<sub>85</sub>H<sub>75</sub>AuBCl<sub>5</sub>F<sub>15</sub>N<sub>3</sub>P<sub>2</sub>: C 54.58, H 4.04, N 2.25, meas. C 54.83, H 3.91, N 2.46.

**Crystallographic data:** **5**, C<sub>63</sub>H<sub>73</sub>N<sub>2</sub>AuBClF<sub>15</sub>LiO<sub>4</sub>,  $M_r = 1457.42$ , triclinic,  $P\bar{1}$ ,  $a = 10.8473(3)$ ,  $b = 16.4395(4)$ ,  $c = 19.8987(4)$  Å,  $\alpha = 69.270(2)$ ,  $\beta = 87.964(2)$ ,  $\gamma = 88.679(2)$  °,  $V = 3316.39(15)$  Å<sup>3</sup>,  $Z = 2$ ,  $\rho_c = 1.459$  Mg m<sup>-3</sup>,  $T = 150$  K,  $\lambda = 1.54180$  Å, 89243 reflections collected, 13788 independent [ $R(\text{int}) = 0.139$ ], which were used in calculations.  $R_1 = 0.0839$ ,  $wR_2 = 0.2025$  for observed unique reflections [ $I > 2\sigma(I)$ ] and  $R_1 = 0.1159$ ,  $wR_2 = 0.2188$  for all unique reflections. Max. and min. residual electron densities 3.25 and -2.64 e Å<sup>-3</sup>. CCDC 1006578.

### 3. References for ESI

- s1. N. Phillips, R. Tirfoin and S. Aldridge, *Chem. Eur. J.*, 2014, **20**, 3825.
- s2. C. Wang, G. Erker, G. Kehr, K. Wedeking and R. Frohlich, *Organometallics*, 2005, **24**, 4760.
- s3. G. Giordano and R. H. Crabtree, *Inorg. Synth.*, 1990, **28**, 88.
- s4. M. C. Brandys, M. C. Jennings and R. J. Puddephatt, *J. Chem. Soc. Dalton Trans.*, 2000, 4601.
